# Supplementary material
Source: Springer Nature journal article supplement (https://www.springermedizin.de/resource/supplementary/12985_2009_807_MOESM1_ESM.pdf/9609234)

HHV-8 high titer (%)

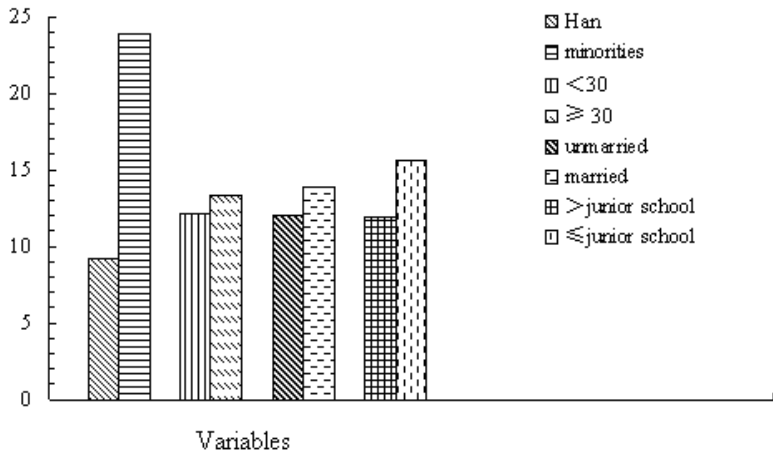

Supplement: MOESM1 [file 9609234]
